# Supplementary material
Source: PubMed Central journal article supplement (PMC3826693)
Supplement: supp_M044347_jlr.M044347-1.pdf [file supp_M044347_jlr.M044347-1.pdf]

## Supplemental Material

to

### Discovery of a Linoleate 9S-Dioxygenase and an Allene Oxide Synthase in a Fusion Protein of *Fusarium oxysporum*

by

Inga Hoffmann and Ernst H. Oliv

**Table S1.** Oligonucleotides used for site-directed mutagenesis of FOXB\_01332.

| Oligonucleotides used for site-directed mutagenesis of 9S-DOX-AOS |                                            |                                             |
|-------------------------------------------------------------------|--------------------------------------------|---------------------------------------------|
| Replacement                                                       | 5'- Forward primer                         | 5'- Reverse primer                          |
| F416W                                                             | gagttcaatcttctaccgctggcactcttgcactccaagc   | gcttgagatgcaagagtgccagcggtagagaagattgaactc  |
| E946V                                                             | gttctgtcactgctttctactgtggtctgtcttcttcttc   | gaaggaagaacgacagaaccacgtagaaagcagtgacaggaac |
| S949A                                                             | ctgctttctacgaggttctgcttcttcttctgctcggag    | ctccggacgaaggaagaacgccagaacctgtagaaagcag    |
| N921V                                                             | gttgcttgcgcagggaatgctggtgatcaggtcactgataac | gttatcagtgacctgatcaacgacattccctgctgcaagcaac |

**Fig. S1.**

|            |     |                                                                 |
|------------|-----|-----------------------------------------------------------------|
| ATEG_02036 | 1   | MSSVIVALAVLVLSLLYLTLFRNDLTHLIIIEKLQSFRTGSGWELSPRSRLPRATKAALS    |
| FOXB_01332 | 1   | -----                                                           |
| ATEG_02036 | 61  | SITGTGVGIWSRLYARIFHSDELAEEEDDEKYQAGEAYGDPKVIATSLIKDLRAIGVKGR    |
| FOXB_01332 | 1   | -----MSFNEKFQACEISYGDSEKEDPSSLNNPEKIVADLMKDFAGVRSQAS            |
| ATEG_02036 | 121 | RSDLRRTLEEMKKNKGKPMDDQMHMEKIIATVAMLPRTSKARQRLTGVLIDQLWRSLOHP    |
| FOXB_01332 | 47  | PAQLLGLVKELEKQGPDDKKGTTPELLIGIITALPATSKARTALTINKLIDTLWGNLOHP    |
| ATEG_02036 | 181 | PLSYFG-----NKYQYRTPD                                            |
| FOXB_01332 | 107 | PLSYMGGDVKYDVVNSDKPAHKHNCELYDTIEFKVPGTDVLLREQVPQAPDGLHQYRMPD    |
| ATEG_02036 | 196 | GSYNNPLEPNLGRAGSPYARSIPRIKTMHGVRPDPGLLFDLLMARDSTFKENPAGISSM     |
| FOXB_01332 | 167 | GSFNNILEPNLGRAGIPYARSVKSEKRLHGVRPDPGLLFDLLMARDETTFOENPAGISSM    |
|            |     | <b>HD</b>                                                       |
| ATEG_02036 | 256 | LFYHASIIIHDI FR TNRRDPNLSDTSSYL DLAPLYGSSLEDQLKVRTMEKGLKLPDTFHE |
| FOXB_01332 | 227 | LFYHAAIIIHDI FR TNRTDMNKSDTSSYL DLAPLYGSSLEKQHEVRTMEKGLKLPDTFHE |
| ATEG_02036 | 316 | KRLLGQPAGVNVILVMYSRFHNYVADMLLKINENGRFTL--PPTSSEEARKKALAKQDED    |
| FOXB_01332 | 287 | KRLLGQPAGVNVILVLYSRFHNYVADMLLKINENGRFSLSVPPNA SEEDKAKALAKQDHD   |
| ATEG_02036 | 374 | LFQVARLVNGLYVNISLHDYLRGLTNTTHSASDWTLDPRIA VGRITFDPDGVPRGIGNQI   |
| FOXB_01332 | 347 | LFNVARLVTCGLYINICLHDYLRATNTTHSASDWTLDPRIAIDKQFDGQGVPRGIGNQV     |

**YRFH**

ATEG\_02036 434 SAEFNLLYRFHVSISRDEKWTNEFLKSLFP-DLNKPLDQLTPQEFMMGLRVEQSIDKD  
 FOXB\_01332 407 SVEFNLLYRFHSCISKRDEKWTNEFLKLFPCRKAEDLQDVSWTELGOALLIEQNTPKD

**F**

ATEG\_02036 493 PSKREFGGLKRSFDGKFNDA DLVQILKDSMEDPAGLFGPRNVPKALRMIEIAGIWSARKW  
 FOXB\_01332 467 PSVRITFDGLERQADGTFKDEDLVRILKDAMEDPAGTFGARVMPKALKVVEVLGI IQGRKW

ATEG\_02036 553 DLGSLNEMRDFFKLKRHATFEDINPDPEIADLIRKLYDHPDMVEMYPGMFLEDAKPRLDP  
 FOXB\_01332 527 QCASLNEMRDFFGGLKRYDSFSEINSNPDIANLEKLYTDDPMVEIYPGLMIEDIKPQRNP

ATEG\_02036 613 CGGGCPPTVGRAVFSDAVTLVRSDFRLTIDYTA SNLTNWGTRREVQODYDILGGSMFHKL  
 FOXB\_01332 587 GSGIMPTY SVGRAVLSDAVTLVRSDFRNTIDYTVSNLTAWGNREVQODYKTGGSMLYKL

ATEG\_02036 673 IQRAIPGWFPNNSLHATQPMFTKMKNEQIAREIGTIDHYSIADPAPPPRKIVLTDYATNI  
 FOXB\_01332 647 IQRGVPNWFPNNSIAVMQPMFTKKANEQIAREIGTFDQYILDDPKAPPKVAVLTSGPAIK

ATEG\_02036 733 KVLKDQASRVPWARYLNDVFPG-KTYNDMLCGDDPANAAQKLVHSILFSPDQFLDLL  
 FOXB\_01332 707 QILSNTKQVVPWLKPLNTEFPGKKDFGWEMLAGDQFQNYTHANFSKAMSKIPNMHNAV

ATEG\_02036 792 SETTTKLGSELKANTLWLTKDLHQVDIIRDVAIPLNARIADLFLCDMKTPENFTGSMN  
 FOXB\_01332 767 HAFIEREGKLINKETFTLKKGLDQIDIIRDVAIPLNTQLIADLFYFDLRTENEDGKLG

ATEG\_02036 852 AATVYRHLNVRIWGFNNNDPALMLQRRKWAIESAEALIEETTKIVNEQAQPAQSCVILKN  
 FOXB\_01332 827 VAELYRSLDRIWGVNNNDPAQAWNRRRRAQEGAKRMIETTKTIVAEADAGRPRCIGLV

**N**

ATEG\_02036 912 LMTRRQATG-----TLRWYGNNAKEMMEMGMSAEVADICWLTAIGGVGTFSGVVAN  
 FOXB\_01332 887 SAVANRIGRSYLKKDSLRSCLKIVEELLAQGNNDQVTDNLWLTAFGGIGVETVAFYE

**NVDQ** **E**

**VLQ** **EAxR**

ATEG\_02036 965 VLQYYFRYENLCHWEETQKVTQPDTPAADRTLRQYVLEARNLTSMECTVRVCAREVTVVD  
 FOXB\_01332 947 VLSFFLRPENELIWAEVQAIAQKGD---DAILHAYVAEAQRNLTSSQRNVRVATAPGEVQ

**VLS**

**YGxHECxxKxxAxxF**

ATEG\_02036 1025 GHDFKPGEVIVNHLGLACRDPENIPDADKFRLLDRPASAYIQVGYGAHECLGKETAITFAV  
 FOXB\_01332 1003 GQAIQPGTAVVLMLEAGRNPKVEVPDAGKFNPPQRKKEDVSAFSGQHECIAKDVAFVFT

ATEG\_02036 1085 SMIRILAGLKYLRPAPGEMGVLSVSMADGRQAFNLNDSWSNLTDPTSKSNMHGKASAVD-  
 FOXB\_01332 1063 GILKLVADLKELRPAPGQMGTVKTIQVGTEKAFNLNDSWSYLGFDASTWKVHFNGHGKGF

ATEG\_02036 -----  
 FOXB\_01332 1123 EGERVPTKSTPIQEYYYYLLQKRKDEILGN

**Fig. S1.** Alignment of ATEG\_02036 and FOXB\_01332 by ClustalW algorithm, marked by Boxshade. Some conserved elements are marked in red above the alignment. The positions which were subject to site-directed mutagenesis are marked in blue letters below the alignment.

**Fig. S2.**

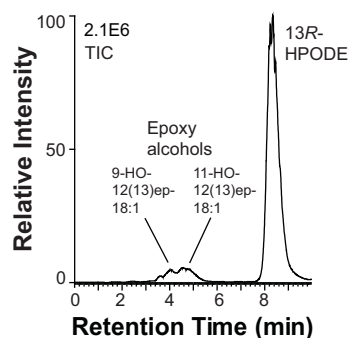

**Fig. S2.** RP-HPLC-MS/MS analysis of products formed by incubation of 13R-HPODE with 9S-DOX-AOS. The main products are two epoxyalcohols, which were formed in equal amounts as judged from the ion intensities of  $m/z$  193 (9-hydroxy-12(13)epoxy-(10E)-octadecenoic acid) and  $m/z$  197 (11-hydroxy-12(13)epoxy-(9Z)-octadecenoic acid) in the MS/MS analysis ( $m/z$  311  $\rightarrow$  full scan).

**Fig. S3.**

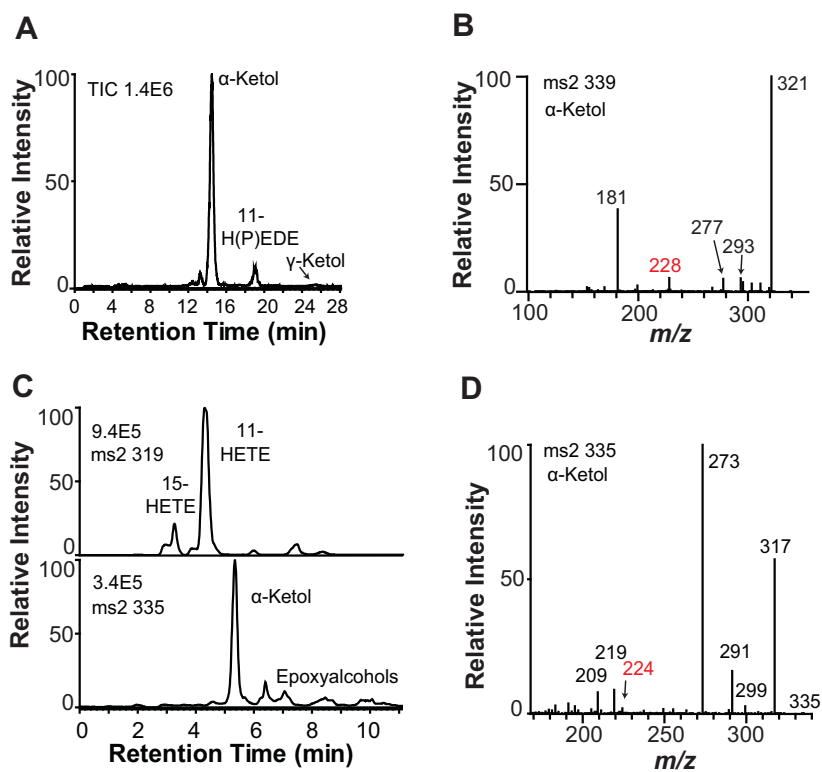

**Fig. S3.** Oxidation of 20:2n-6 and 20:4n-6 by 9S-DOX-AOS. A, NP-HPLC-MS/MS analysis of products formed from 20:2n-6. B, MS/MS spectrum of the  $\alpha$ -ketol formed from 20:2n-6. C, NP-HPLC-MS/MS analysis of products formed from 20:4n-6. D, MS/MS spectrum of the  $\alpha$ -ketol formed from 20:4n-6.
